# Supplementary figures and images for: Identification of a Novel Papillomavirus Associated with Squamous Cell Carcinoma in a Domestic Cat
Source: Preprints.org preprint supplement (doi:10.20944/preprints201912.0302.v1), 2019-12-23

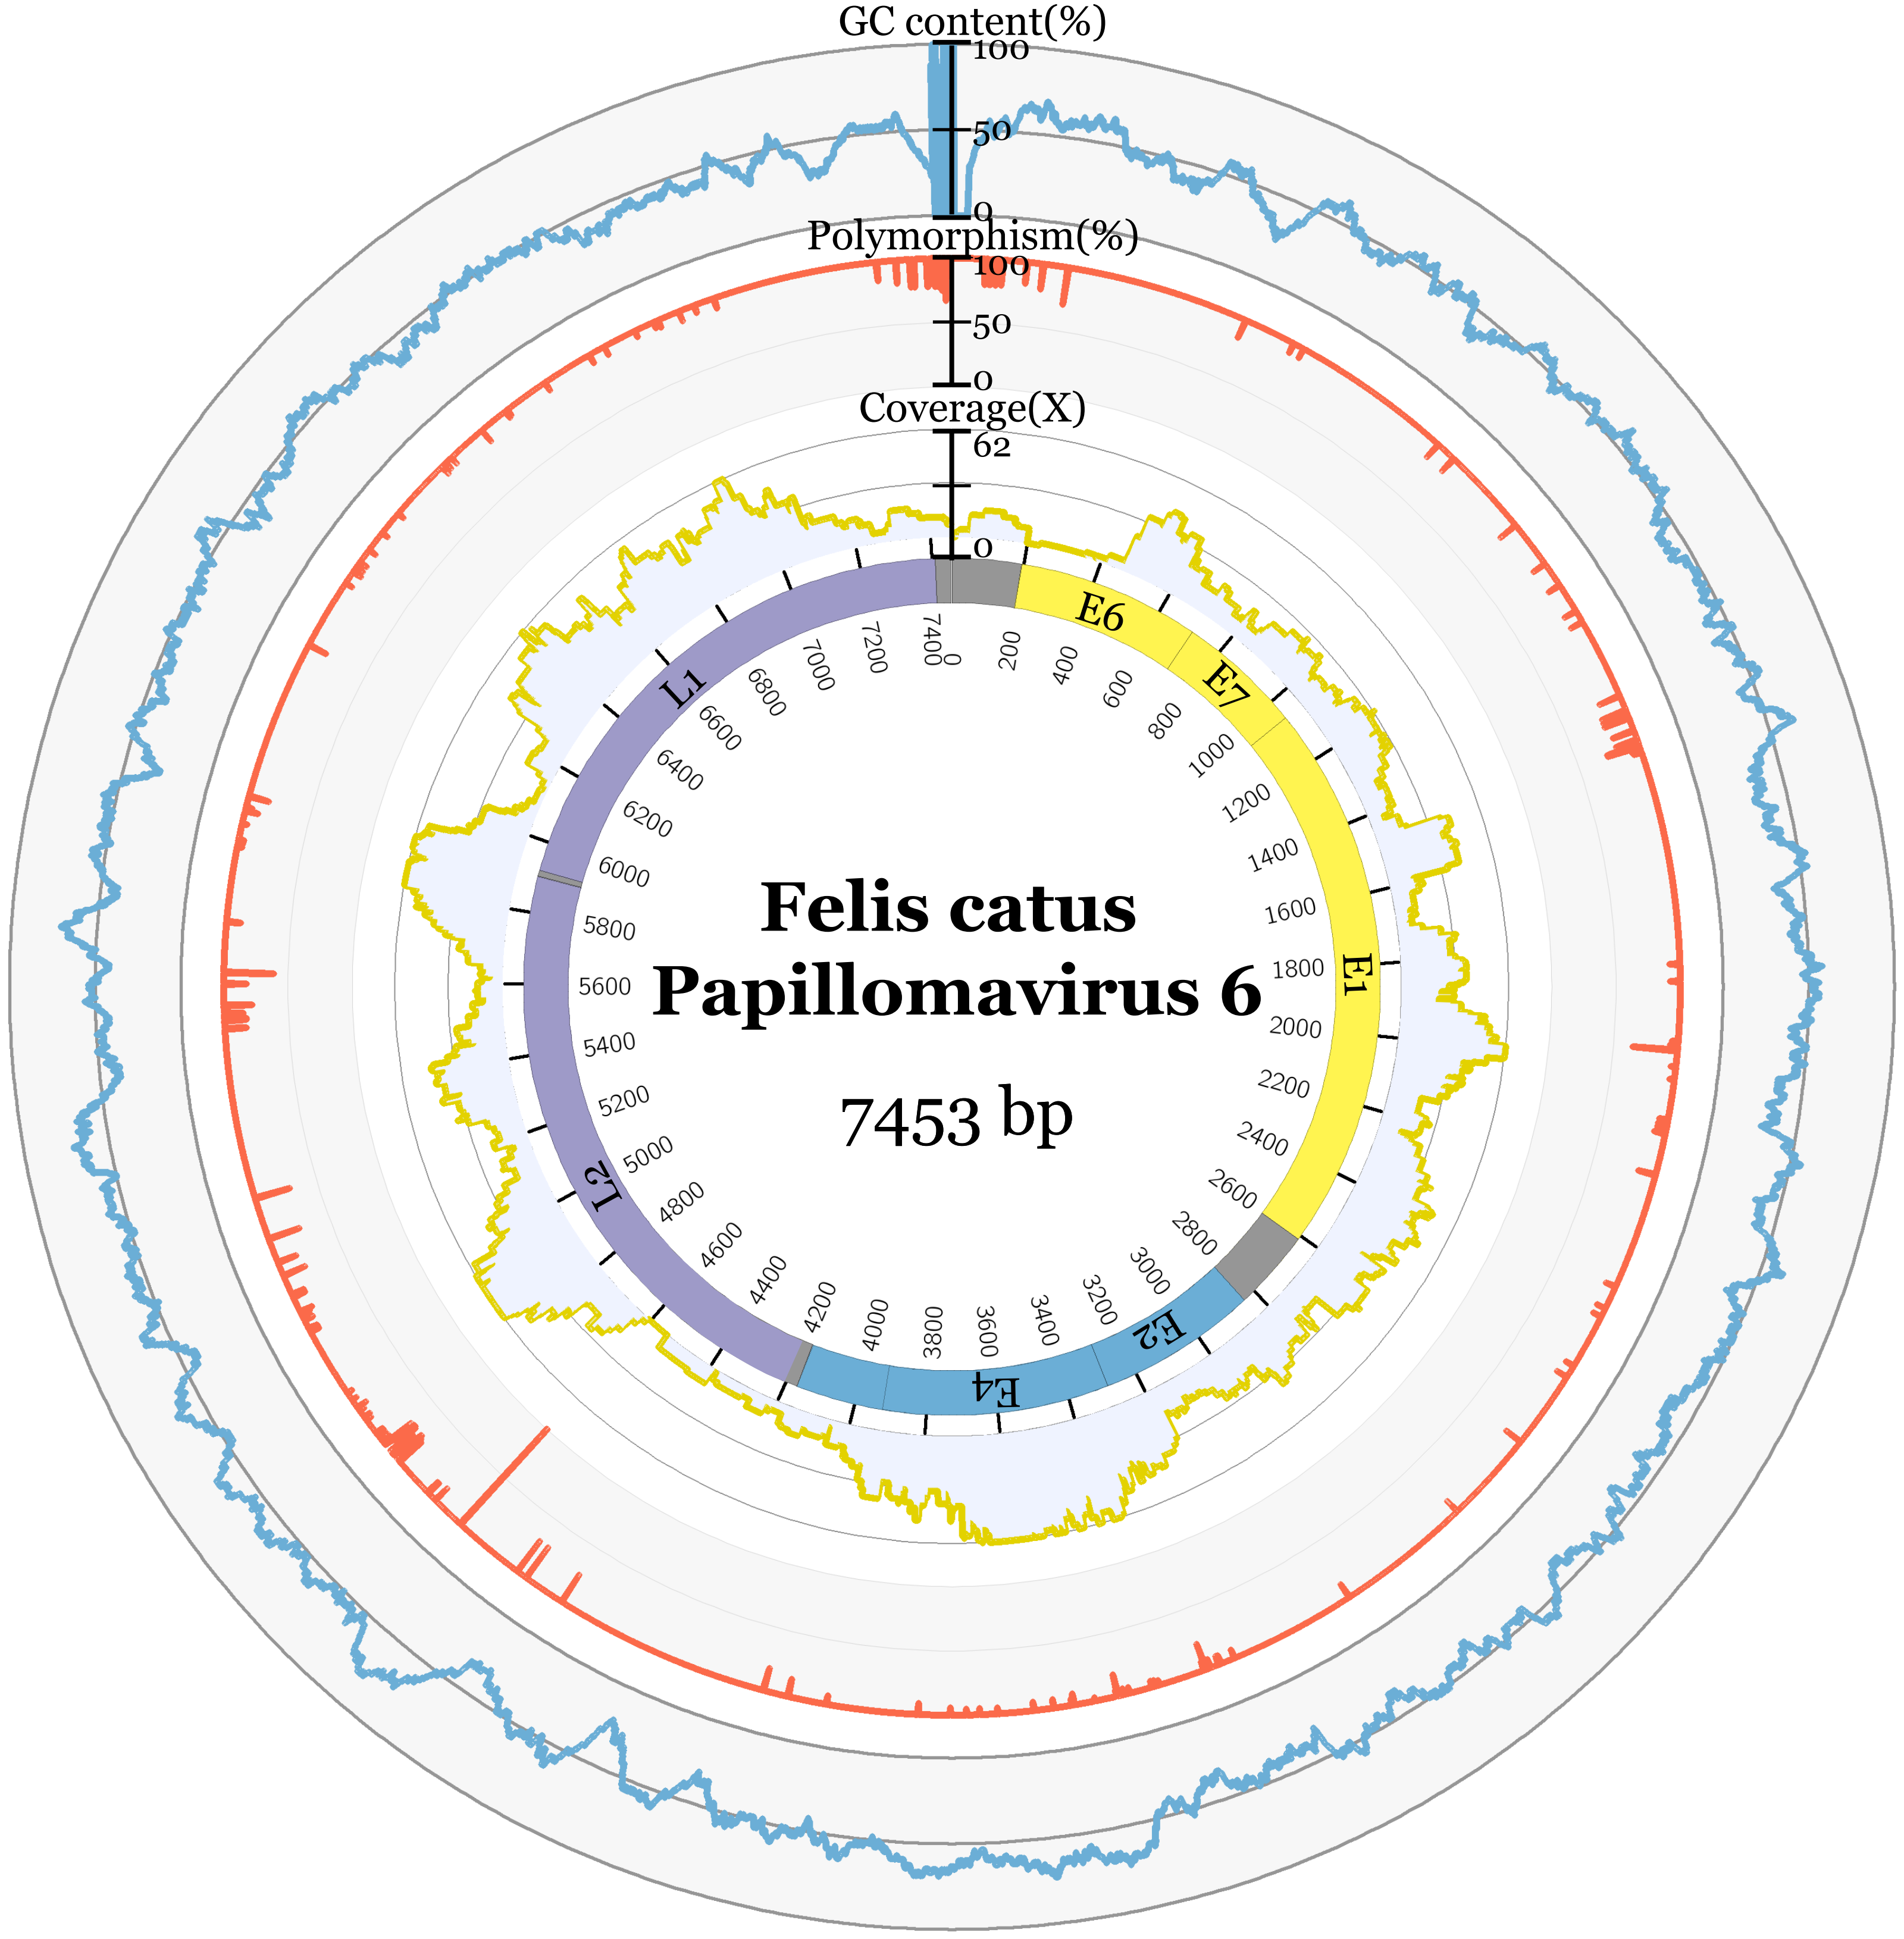

Supplement: Supplementary file 1 [file supplementary]
